# Supplementary material for: Amyloid Deposits and Fibrosis on Left Ventricular Endomyocardial Biopsy Correlate With Extracellular Volume in Cardiac Amyloidosis
Source: PubMed Central journal article supplement — J Am Heart Assoc. 2021 Oct 8;10(20):e020358. doi: 10.1161/JAHA.120.020358 (PMC8751897; doi:10.1161/jaha.120.020358), 2021-10-08
Supplement: JAH3-10-e020358-s001.pdf [file JAH3-10-e020358-s001.pdf]

# **Supplemental Material**

**Table S1. Comparison between patients undergoing or not undergoing cardiac magnetic resonance (CMR).**

|                                        | <b>All patients<br/>n=37</b> | <b>CMR<br/>n=29 (78)</b> | <b>No CMR<br/>n=8 (22)</b> | <b>p</b>     |
|----------------------------------------|------------------------------|--------------------------|----------------------------|--------------|
| Men, n (%)                             | 34 (92)                      | 27 (93)                  | 7 (88)                     | 0.607        |
| Age (years)                            | 72 (68-81)                   | 71 (64-82)               | 74 (67-84)                 | 0.704        |
| AL/ATTR, n (%)                         |                              | 16/13 (55/45)            | 3/5 (38/63)                | 0.376        |
| eGFR (mL/min/1.73 m <sup>2</sup> )     | 67 (45-79)                   | 62 (44-84)               | 49 (41-77)                 | 0.373        |
| NYHA class I-II/III-IV, n (%)          |                              | 12/17 (41/59)            | 3/5 (38/62)                | 0.843        |
| NT-proBNP (ng/L)                       | 6,772 (2,071-12,557)         | 7,901 (1,294-12,872)     | 10,055 (5,265-14,800)      | 0.421        |
| hs-TnT (ng/L)                          | 62 (38-140)                  | 60 (38-173)              | 79 (34-202)                | 0.925        |
| sST2 (ng/mL)                           | 27 (16-37)                   | 28 (17-41)               | 22 (15-33)                 | 0.415        |
| <b>TTE</b>                             |                              |                          |                            |              |
| E/e'                                   | 17 (12-24)                   | 19 (12-24)               | 17 (13-26)                 | 0.842        |
| LAVi (mL/m <sup>2</sup> )              | 24 (21-28)                   | 21 (20-26)               | 28 (24-30)                 | <b>0.023</b> |
| Moderate/severe aortic stenosis, n (%) | 2 (5)                        | 2 (7)                    | 0 (0)                      | 0.445        |
| TAPSE                                  | 17 (13-22)                   | 18 (14-22)               | 13 (11-18)                 | 0.208        |

| Diphosphonate scintigraphy                  |                        |                        |                      |       |
|---------------------------------------------|------------------------|------------------------|----------------------|-------|
| Perugini score 0/1/2/3, n (%)               | 18/0/5/14 (49/0/14/38) | 15/0/3/11 (52/0/10/38) | 3/0/2/3 (38/0/25/38) | 0.533 |
| Heart-to-controlateral lung ratio           | 1.36 (1.06-1.91)       | 1.30 (1.04-1.83)       | 1.41 (1.09-2.18)     | 0.604 |
| Extent of amyloid deposits (%)              | 15 (10-30)             | 18 (8-30)              | 23 (8-45)            | 0.625 |
| Amyloid pattern                             |                        |                        |                      |       |
| Minimal, n (%)                              | 3 (8)                  | 3 (10)                 | 0 (0)                | 0.213 |
| Focal, n (%)                                | 1 (3)                  | 0 (0)                  | 1 (13)               |       |
| Multifocal, n (%)                           | 29 (78)                | 23 (79)                | 6 (75)               |       |
| Diffuse, n (%)                              | 4 (11)                 | 3 (10)                 | 1 (13)               |       |
| Amyloid location                            |                        |                        |                      |       |
| Interstitial, n (%)                         | 11 (30)                | 10 (35)                | 1 (13)               | 0.234 |
| Interstitial and perivascular, n (%)        | 23 (62)                | 16 (55)                | 7 (88)               |       |
| Interstitial, perivascular, vascular, n (%) | 3 (8)                  | 3 (10)                 | 0 (0)                |       |
| H score                                     | 9 (8-10)               | 9 (8-10)               | 10 (8-10)            | 0.378 |
| Extent of fibrosis (%)                      | 15 (10-23)             | 13 (10-28)             | 16 (6-23)            | 0.704 |
| Extent of amyloidosis and fibrosis (%)      | 40 (30-49)             | 40 (23-49)             | 38 (32-53)           | 0.957 |
| CD3+ (cells/mm <sup>3</sup> )               | 6 (5-10)               | 6 (5-10)               | 8 (3-13)             | 0.926 |

|                                |           |           |           |       |
|--------------------------------|-----------|-----------|-----------|-------|
| CD68+ (cells/mm <sup>3</sup> ) | 11 (7-16) | 12 (8-15) | 10 (7-18) | 0.564 |
|--------------------------------|-----------|-----------|-----------|-------|

AL, amyloid light chain amyloidosis; ATTR, amyloid transthyretin amyloidosis; ECV, extracellular volume; eGFR, estimated glomerular filtration rate; hs-TnT, high-sensitivity troponin T; IVS, interventricular septum; LGE, late gadolinium enhancement; LVEDVi, left ventricular end-diastolic volume index; LVEF, left ventricular ejection fraction; LVESVi, left ventricular end-systolic volume index; LVMI, left ventricular mass index; NT-proBNP, N-terminal fragment of pro-B-type natriuretic peptide; NYHA, New York Heart Association; PW, posterior wall thickness; RVEDVi, right ventricular end-diastolic volume index; RVEF, right ventricular ejection fraction; sST2, soluble suppression of tumorigenesis-2; SVi, stroke volume index; TAPSE, tricuspid annular plane systolic excursion; TTE, transthoracic echocardiography. (\*) Myocardial T1, ECV, matrix volume and cell volume were available only in 20 subjects.

**Table S2. Histological findings on left ventricle endomyocardial biopsies.**

| <b>Patient n</b> | <b>Patient<br/>(M/W, age)</b> | <b>AL/ATTR</b> | <b>Amyloid<br/>(%)</b> | <b>Fibrosis<br/>(%)</b> | <b>Amyloid<br/>pattern</b> | <b>Amyloid<br/>location</b> | <b>CD3+<br/>(cells/mm<sup>2</sup>)</b> | <b>CD68+<br/>(cells/mm<sup>2</sup>)</b> | <b>H score</b> |
|------------------|-------------------------------|----------------|------------------------|-------------------------|----------------------------|-----------------------------|----------------------------------------|-----------------------------------------|----------------|
| 1                | M, 67                         | ATTR           | 15                     | 17                      | MF                         | I                           | 5                                      | 12                                      | 8              |
| 2                | M, 70                         | ATTR           | 10                     | 30                      | MF                         | I+PV                        | 8                                      | 13                                      | 9              |
| 3                | M, 73                         | ATTR           | 10                     | 10                      | MF                         | I                           | 7                                      | 7                                       | 7              |
| 4                | M, 75                         | AL             | 35                     | 10                      | D                          | I+PV                        | 39                                     | 21                                      | 12             |
| 5                | M, 77                         | AL             | 30                     | 5                       | MF                         | I+PV                        | 9                                      | 7                                       | 10             |
| 6                | M, 85                         | AL             | 20                     | 30                      | MF                         | I+PV                        | 10                                     | 15                                      | 12             |
| 7                | M, 83                         | ATTR           | 50                     | 20                      | MF                         | I+PV                        | 5                                      | 6                                       | 9              |
| 8                | M, 82                         | ATTR           | 10                     | 12                      | MF                         | I+PV                        | 25                                     | 8                                       | 9              |
| 9                | M, 84                         | ATTR           | 5                      | 40                      | MF                         | I                           | 6                                      | 9                                       | 8              |
| 10               | M, 75                         | ATTR           | 15                     | 30                      | MF                         | I+PV                        | 7                                      | 9                                       | 9              |
| 11               | M, 69                         | AL             | 30                     | 10                      | MF                         | I+PV+V                      | 7                                      | 19                                      | 9              |
| 12               | W, 77                         | ATTR           | 60                     | 15                      | MF                         | I+PV                        | 4                                      | 8                                       | 9              |
| 13               | M, 72                         | AL             | 15                     | 30                      | MF                         | I+PV+V                      | 6                                      | 15                                      | 8              |
| 14               | M, 60                         | AL             | 10                     | 60                      | MF                         | I                           | 41                                     | 38                                      | 12             |
| 15               | M, 63                         | ATTR           | 5                      | 30                      | M                          | I                           | 6                                      | 11                                      | 7              |
| 16               | M, 73                         | AL             | 30                     | 10                      | MF                         | I                           | 9                                      | 12                                      | 11             |
| 17               | M, 67                         | AL             | 10                     | 10                      | MF                         | I+V                         | 3                                      | 15                                      | 8              |
| 18               | M, 84                         | ATTR           | 10                     | 20                      | MF                         | I+PV                        | 9                                      | 12                                      | 9              |

|    |       |      |    |    |    |        |    |    |    |
|----|-------|------|----|----|----|--------|----|----|----|
| 19 | W, 67 | AL   | 30 | 5  | MF | I      | 8  | 18 | 9  |
| 20 | M, 83 | AL   | 7  | 13 | MF | I      | 6  | 8  | 7  |
| 21 | M, 75 | ATTR | 50 | 5  | D  | I+PV   | 1  | 4  | 7  |
| 22 | M, 51 | ATTR | 30 | 20 | MF | I      | 7  | 13 | 10 |
| 23 | M, 67 | AL   | 30 | 18 | MF | I+PV   | 8  | 7  | 10 |
| 24 | M, 84 | ATTR | 50 | 15 | MF | I+PV   | 2  | 7  | 8  |
| 25 | M, 70 | AL   | 35 | 7  | MF | I      | 3  | 6  | 8  |
| 26 | M, 64 | AL   | 30 | 15 | MF | I+PV   | 7  | 13 | 11 |
| 27 | M, 80 | ATTR | 5  | 9  | MF | M      | 5  | 10 | 6  |
| 28 | W, 72 | AL   | 7  | 10 | F  | I+PV   | 14 | 34 | 10 |
| 29 | M, 69 | AL   | 10 | 30 | MF | I+PV   | 4  | 8  | 8  |
| 30 | M, 75 | ATTR | 30 | 20 | MF | I+PV   | 5  | 7  | 10 |
| 31 | M, 83 | ATTR | 7  | 25 | MF | I+PV   | 17 | 19 | 11 |
| 32 | M, 70 | AL   | 10 | 20 | MF | I+PV   | 5  | 9  | 8  |
| 33 | M, 77 | AL   | 30 | 10 | D  | I+PV   | 10 | 5  | 8  |
| 34 | M, 70 | ATTR | 40 | 10 | D  | I+PV   | 2  | 14 | 9  |
| 35 | M, 67 | AL   | 7  | 14 | MF | I+PV+V | 12 | 11 | 8  |
| 36 | M, 74 | AL   | 5  | 10 | M  | I      | 18 | 16 | 9  |
| 37 | M, 86 | ATTR | 25 | 12 | MF | I+V    | 5  | 9  | 8  |

AL, amyloid light-chain; ATTR, amyloid transthyretin; M, man; W, woman. Amyloid pattern: D, diffuse; F, focal; M, minimal; MF, multifocal.

Amyloid location: I, interstitial; PV, perivascular; V, vascular.

**Table S3. Predictors of circulating biomarkers.**

|                           | hs-TnT       |              |       | NT-proBNP        |              |       | sST2  |       |       |
|---------------------------|--------------|--------------|-------|------------------|--------------|-------|-------|-------|-------|
|                           | All          | AL           | ATTR  | All              | AL           | ATTR  | All   | AL    | ATTR  |
| <b>LGE score</b>          | <b>0.006</b> | <b>0.044</b> | 0.373 | <b>&lt;0.001</b> | <b>0.005</b> | 0.451 | 0.146 | 0.052 | 0.772 |
| <b>ECV</b>                | <b>0.004</b> | 0.089        | 0.258 | <b>0.009</b>     | 0.200        | 0.057 | 0.488 | 0.808 | 0.918 |
| <b>Amyloid %</b>          | <b>0.005</b> | <b>0.047</b> | 0.736 | <b>0.044</b>     | 0.091        | 0.471 | 0.093 | 0.142 | 0.982 |
| <b>Fibrosis %</b>         | 0.199        | 0.267        | 0.771 | 0.975            | 0.985        | 0.103 | 0.135 | 0.453 | 0.560 |
| <b>Amyloid+fibrosis %</b> | <b>0.035</b> | 0.217        | 0.635 | <b>0.002</b>     | <b>0.014</b> | 0.482 | 0.265 | 0.141 | 0.709 |
| <b>H score</b>            | 0.337        | 0.731        | 0.777 | 0.054            | 0.524        | 0.569 | 0.954 | 0.758 | 0.913 |
| <b>CD3+</b>               | 0.122        | 0.266        | 0.102 | 0.948            | 0.840        | 0.981 | 0.273 | 0.847 | 0.640 |
| <b>CD68+</b>              | 0.719        | 0.638        | 0.477 | 0.215            | 0.755        | 0.712 | 0.707 | 0.770 | 0.273 |

p values from multivariable linear regression analyses are reported. The model includes left ventricular mass index and ejection fraction. All variables were ln-transformed. AL, amyloid light chain amyloidosis; ATTR, amyloid transthyretin amyloidosis; ECV, extracellular volume; hs-TnT, high-sensitivity troponin T; LGE, late gadolinium enhancement; NT-proBNP, N-terminal fraction of pro-B-type natriuretic peptide; sST2, soluble suppression of tumorigenesis-2.

**Figure S1. Examples of pre-contrast (native) and post-contrast T1 maps and extracellular volume maps.**

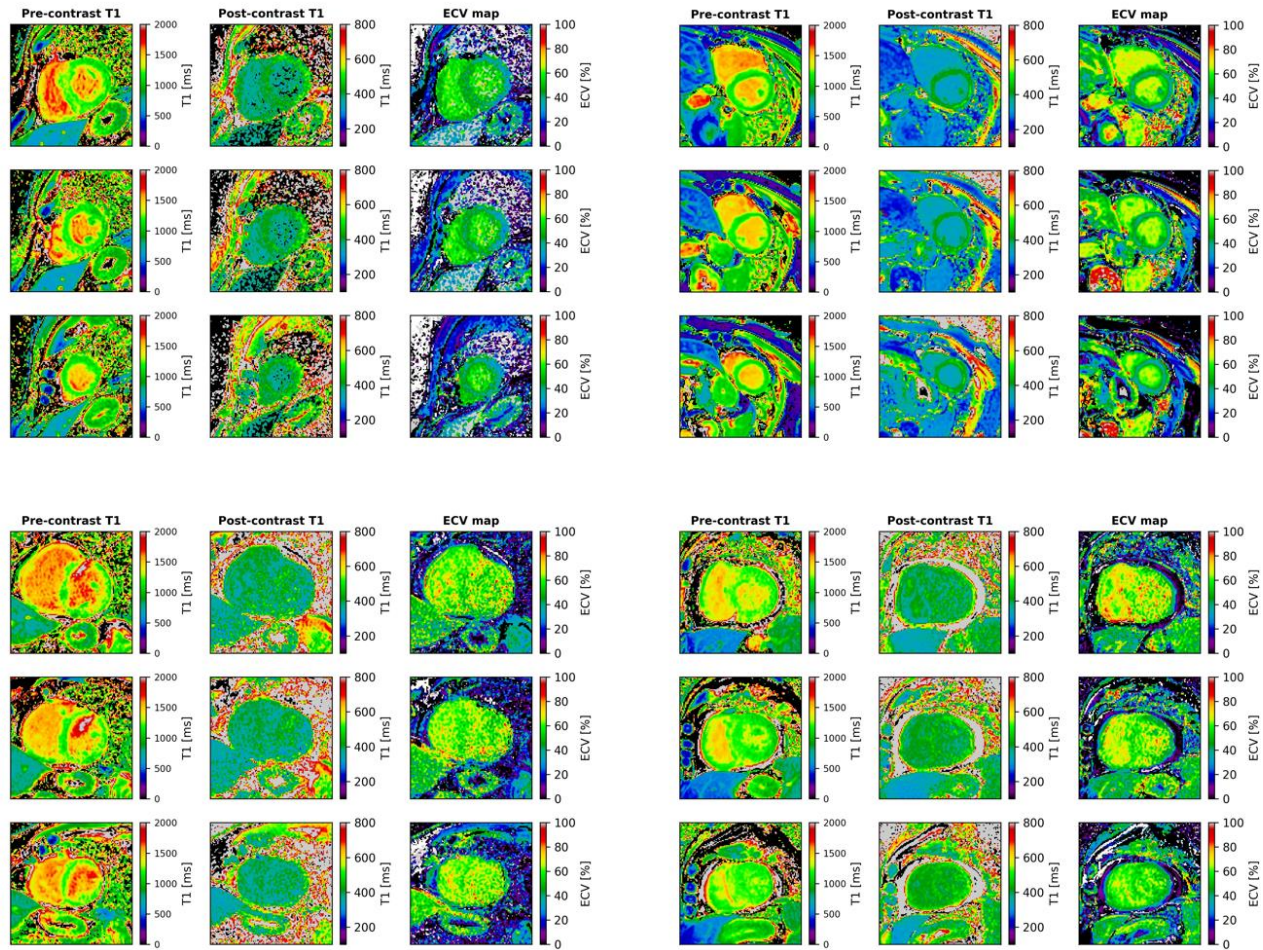



**Figure S2. Endomyocardial biopsy showing diffuse immunoreactivity for lambda Ig light-chains (A) and negative immunostaining for kappa Ig light-chains (B) (Immunoperoxidase staining with hematoxylin counterstaining, original magnification 20x).**

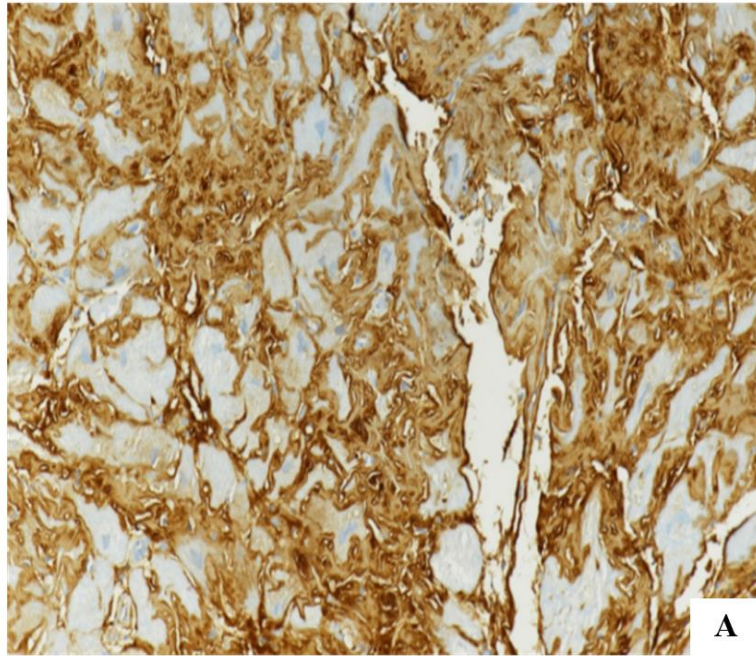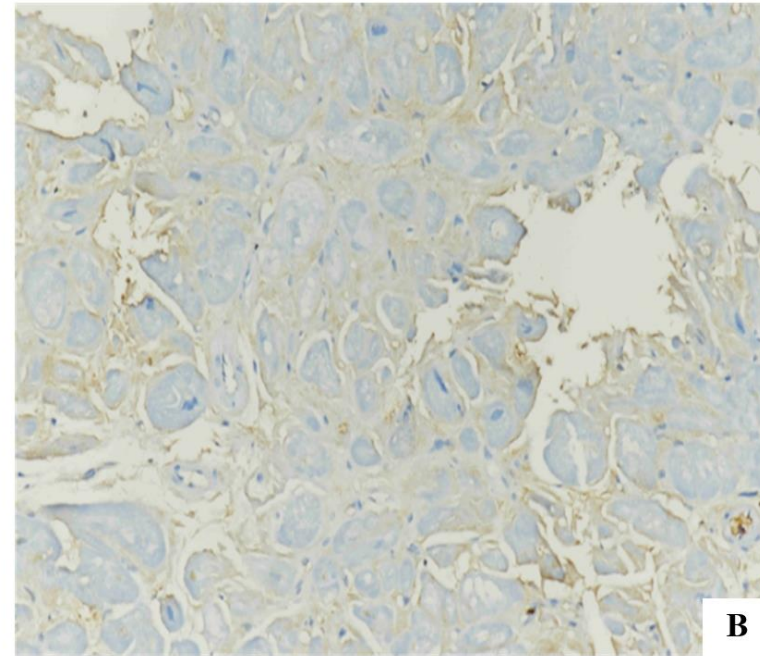

**Figure S3. Focal (A) and mild (A-D) endocardial fibrosis (EF), associated with amyloid deposits (Amy) and interstitial fibrosis (IF) in a left ventricular endomyocardial biopsy.**

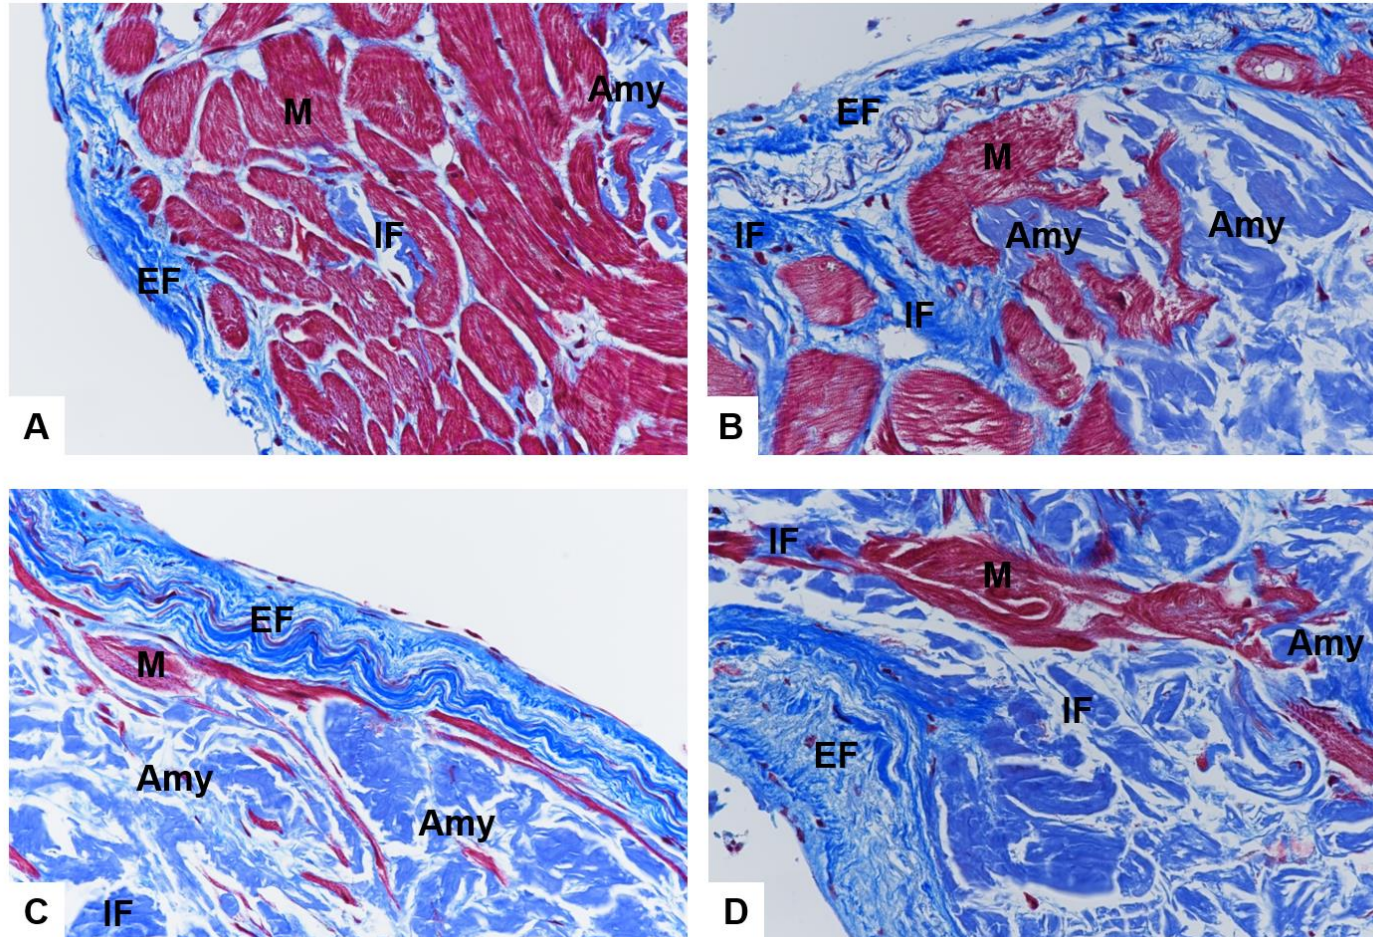

Masson's trichrome staining, original magnification 40x.

**Figure S4. Plurifocal interstitial CD3+ lymphocytes in lambda+ CA (A) versus very few and scattered CD3+ lymphocytes in a TTR+ CA (B)**  
(Immunoperoxidase staining with hematoxylin counterstaining, original magnification 40x).

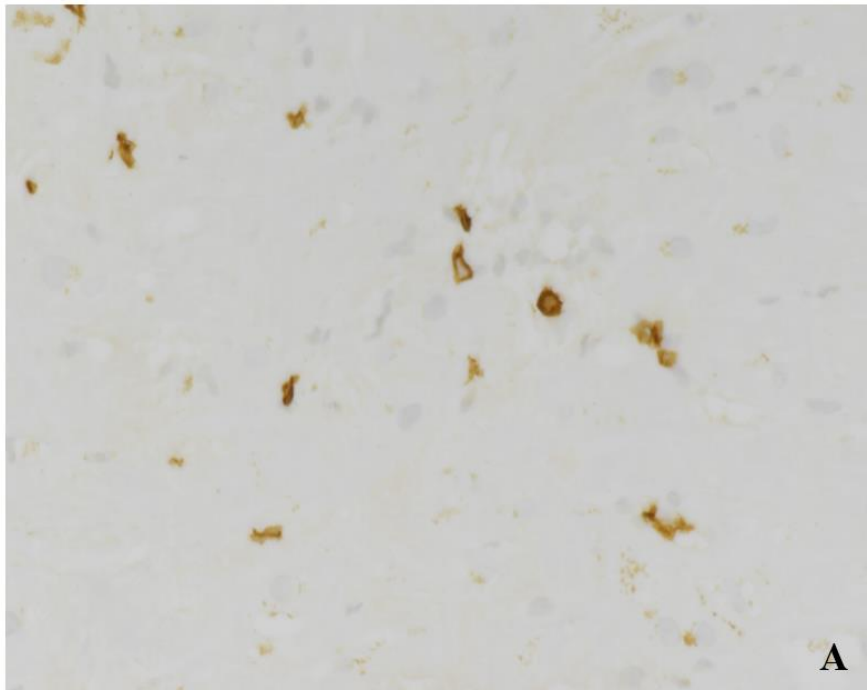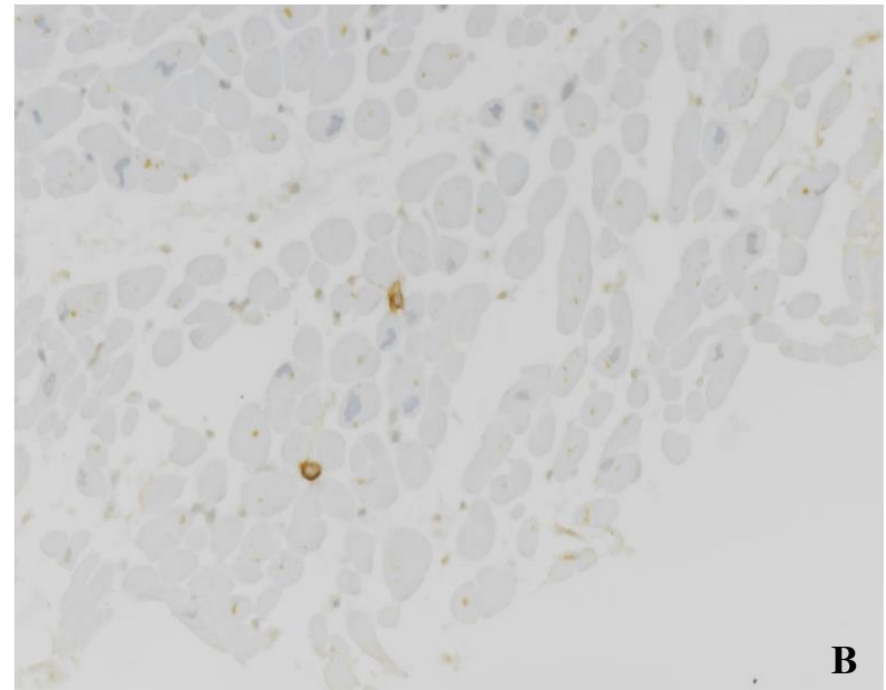

Figure S5. Correlations between the extent of amyloid deposits and late gadolinium enhancement (LGE) score.

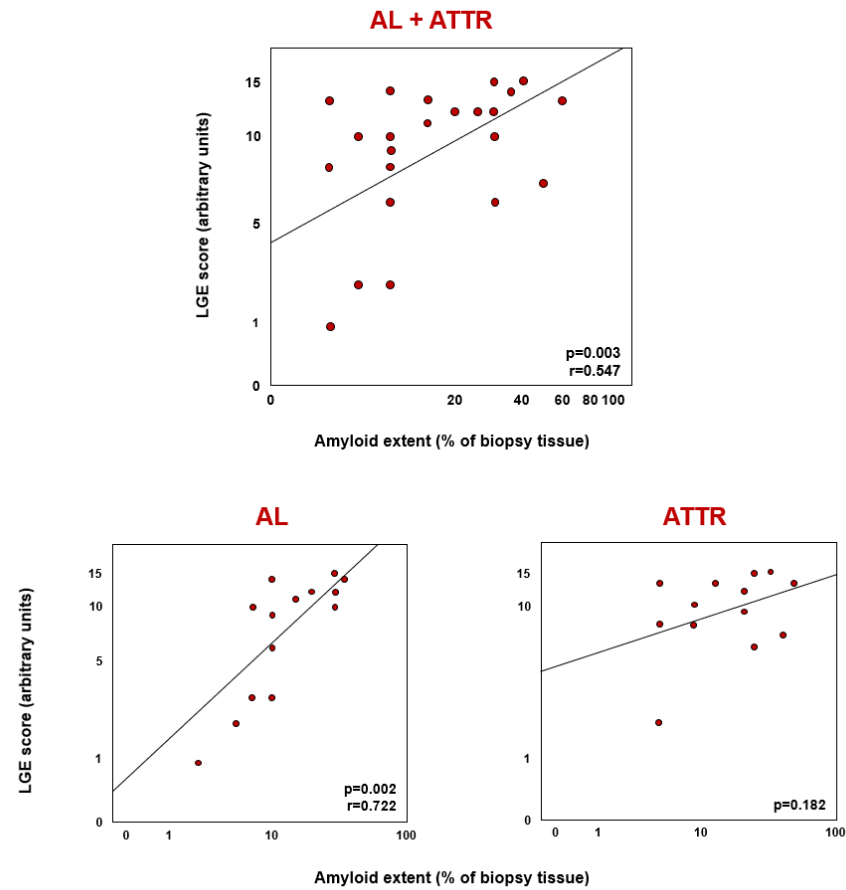

AL, amyloid light chain amyloidosis; ATTR, amyloid transthyretin amyloidosis.

**Figure S6. Correlations between the extent of amyloid deposits and extracellular volume (ECV).**

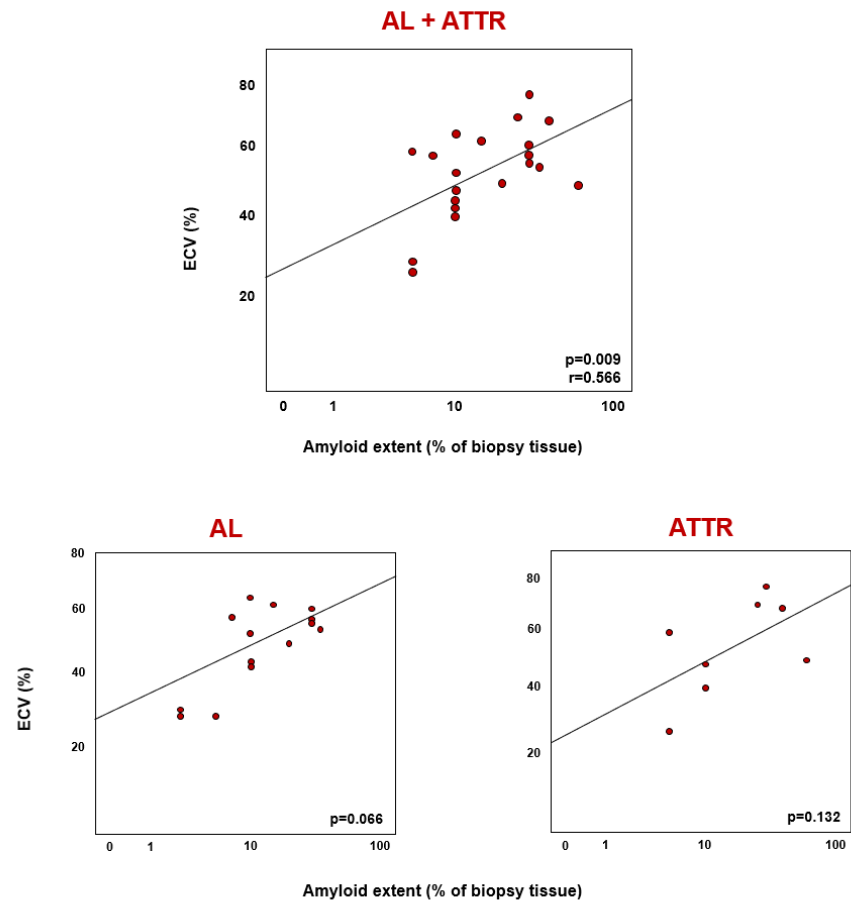

AL, amyloid light chain amyloidosis; ATTR, amyloid transthyretin amyloidosis.
